# Supplementary material for: Polyhydroxyalkanoate (PHA) production by thermophilic Caldimonas thermodepolymerans comb. nov. from xylan
Source: Royal Society of Chemistry journal article supplement (doi:10.1039/d5su00040h), 2025-01-01
Supplement: d5su00040h1.pdf [file d5su00040h1.pdf]

1 **Polyhydroxyalkanoate (PHA) production by thermophilic *Caldimonas thermodepolymerans***  
2 **comb. nov. from xylan**

3 *Wen Zhou*<sup>1,†</sup>, *Salvador Bertrán Llorens*<sup>2,†</sup>, *Peter J. Deuss*<sup>2</sup>, *Gert-Jan. W. Euverink*<sup>1</sup>, *Janneke Krooneman*<sup>1,3\*</sup>

4 <sup>1</sup> Products and Processes for Biotechnology, Engineering and Technology Institute Groningen, Faculty of  
5 Science and Engineering, University of Groningen, Groningen, The Netherlands

6 <sup>2</sup> Chemical Technology, Engineering and Technology Institute Groningen, Faculty of Science and Engineering,  
7 University of Groningen, Groningen, The Netherlands

8 <sup>3</sup> Bioconversion and fermentation technology, Research Centre Biobased Economy, Hanze University of  
9 Applied Sciences, Groningen, The Netherlands

10 **Corresponding author**

11 \* Janneke Krooneman: [j.krooneman@rug.nl](mailto:j.krooneman@rug.nl), [j.krooneman@pl.hanze.nl](mailto:j.krooneman@pl.hanze.nl), (Janneke)

12 † These authors contributed equally to this work.

13

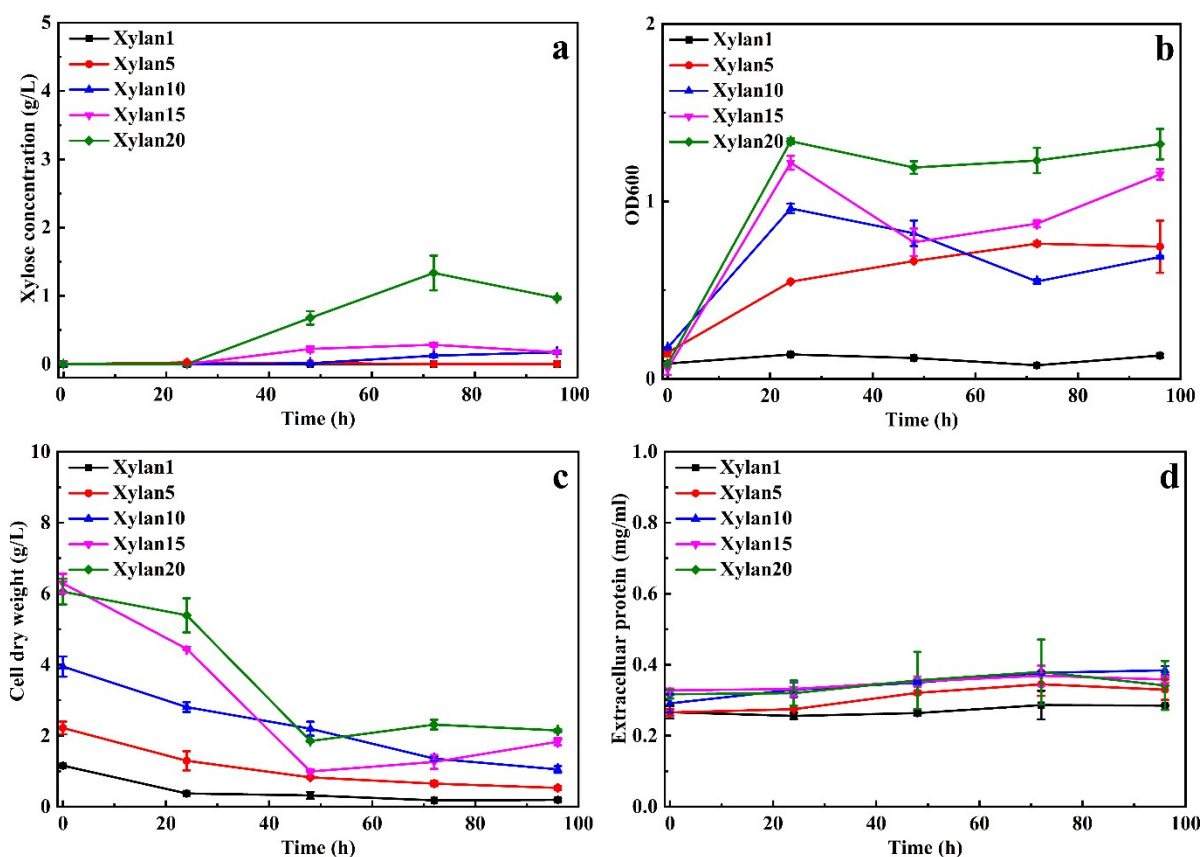

14

15 **Figure S1.** The effect of xylan concentrations on xylose production and cell growth. (a) the production of xylose, (b)  
16 OD<sub>600</sub> measurement of the cell growth, (c) the accumulation of the cell dry weight, and (d) extracellular protein  
17 concentration. The basic growth conditions were 50 °C, 150 rpm, pH 7 and a C/N of 10. The errors presented in the  
18 graphs represent the standard deviation (SD) of the data points, calculated from triplicate measurements of each sample.

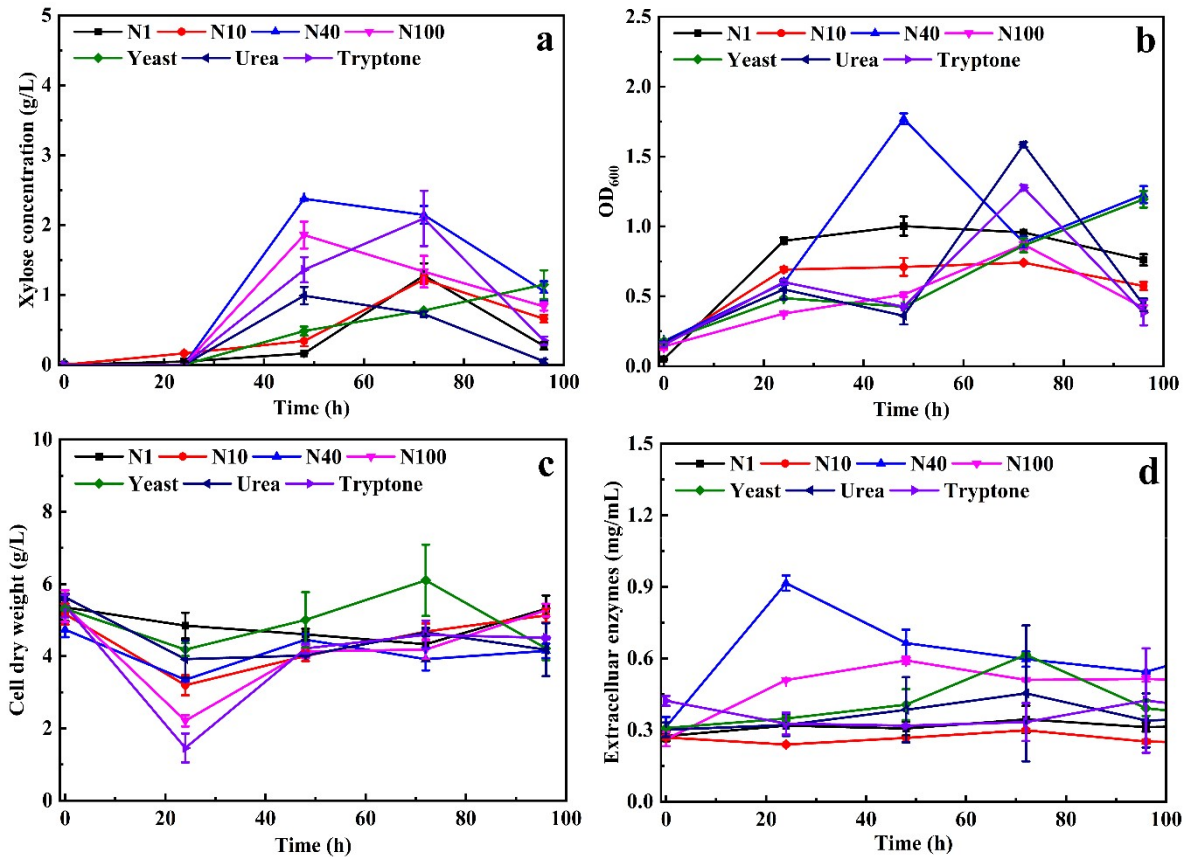

20

21 **Figure S2.** The effect of nitrogen sources and C/N ratios on xylose production and cell growth. (a) the production of  
 22 xylose, (b) OD<sub>600</sub> measurement of the cell growth, (c) the accumulation of the cell dry weight, and (d) extracellular  
 23 protein concentration. The basic growth conditions were 50 °C, 150 rpm, pH 7 and xylan concentration of 20 g/L. The  
 24 errors presented in the graphs represent the standard deviation (SD) of the data points, calculated from triplicate  
 25 measurements of each sample.

26

27

28

29

30

31

32

33

34

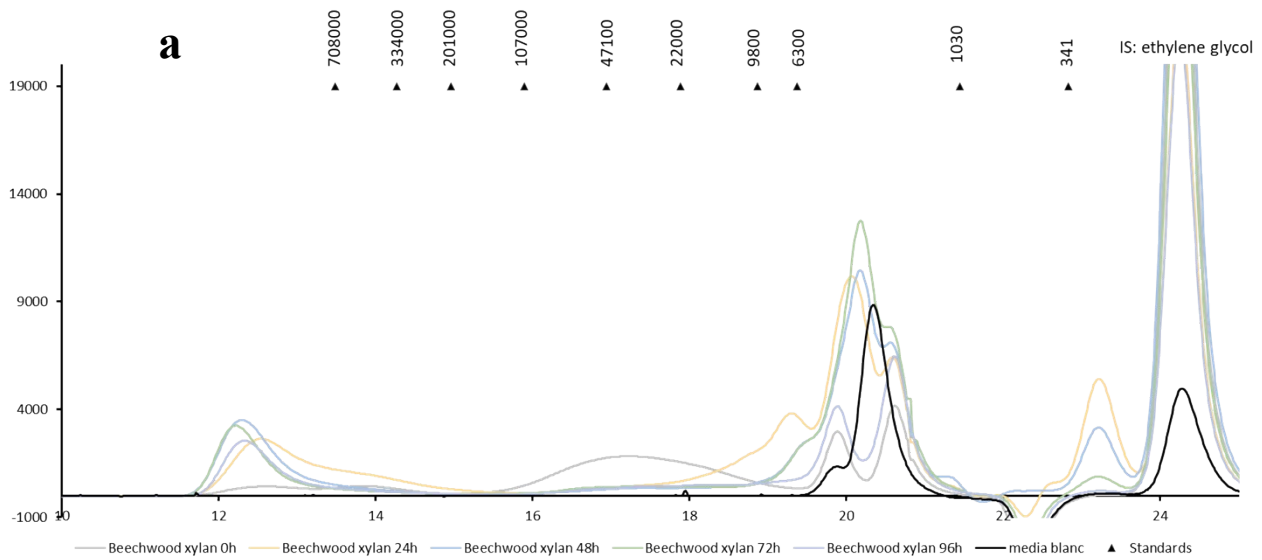

35

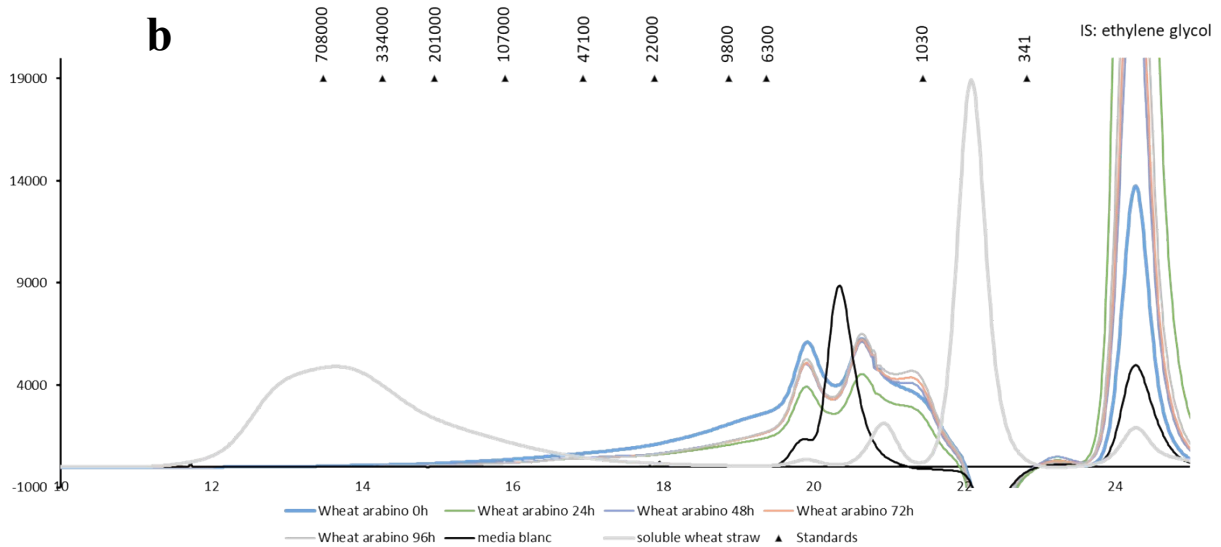

36

37 **Figure S3.** The molecular weight distribution of xylans during polyhydroxyalkanoate (PHA) production process under  
 38 the optimized initial conditions (20 g/L of xylan, a C/N ratio of 40, pH 7, and 50 °C). Beechwood xylan (a) and wheat  
 39 arabinoxylan (b) as the sole carbon sources. The media blank is the mineral medium used for bacterial growth. The  
 40 standards represent the retention time of each molecular weight of the 9 standards used. The molecular weight is  
 41 expressed in Daltons.

42

43

44

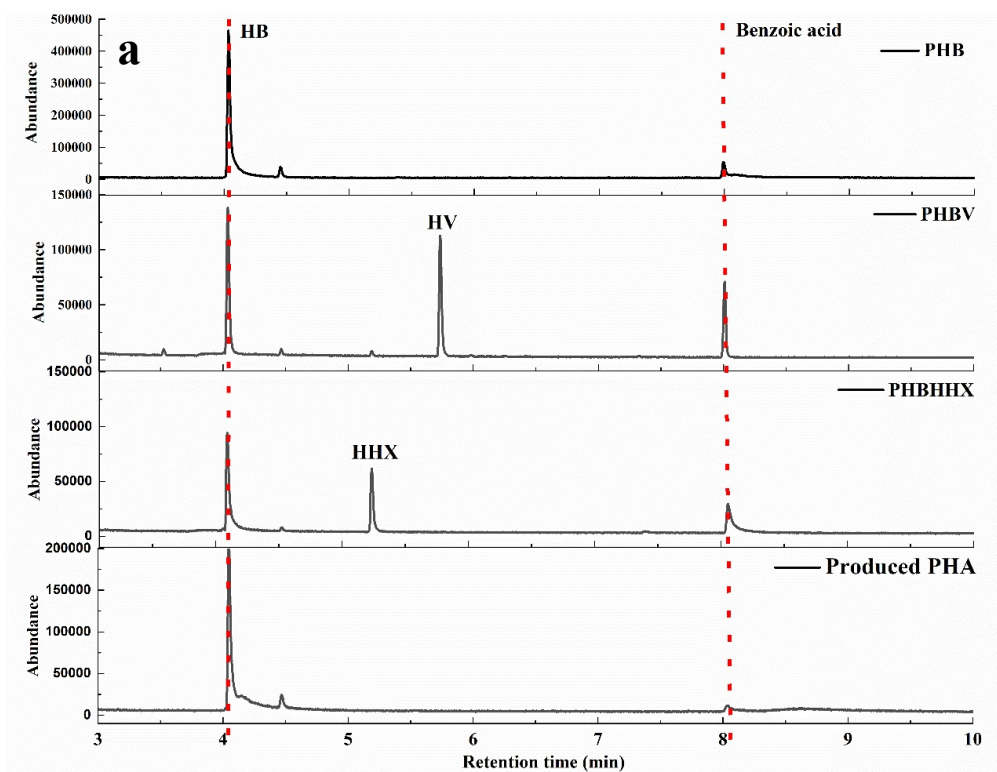

45

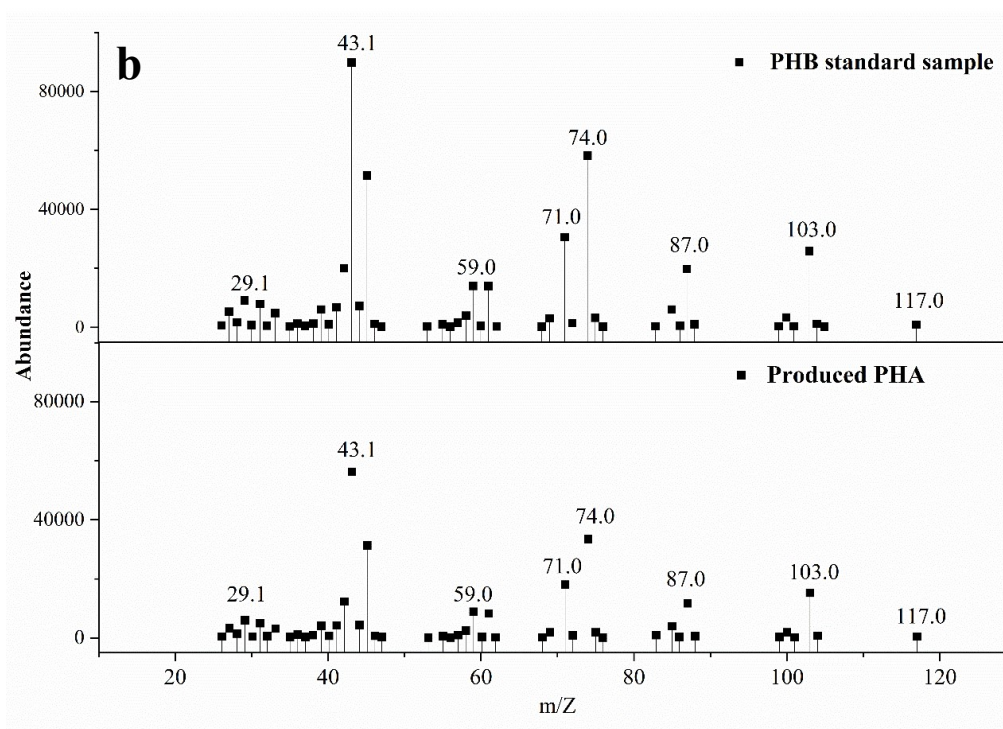

46

47 **Figure S4.** Gas chromatogram (GC) of methanolized commercial poly(3-hydroxybutyrate) (P3HB), poly(3-  
 48 hydroxybutyrate-co-3-hydroxyvalerate) (PHBV), and poly(3-hydroxybutyrate-co-3-hydroxyhexanoate) (PHBHHX), and  
 49 polyhydroxyalkanoate (PHA) produced by *C. thermodepolymerans* from xylans (lower panel). (a) The GC peaks of PHB,  
 50 PHBV, PHBHHX, and the produces PHA, (b). The mass pots of commercial PHB and hydroxyalkanoate (HA) produced  
 51 by *C. thermodepolymerans*. Benzoic acid was added as an internal standard.

52

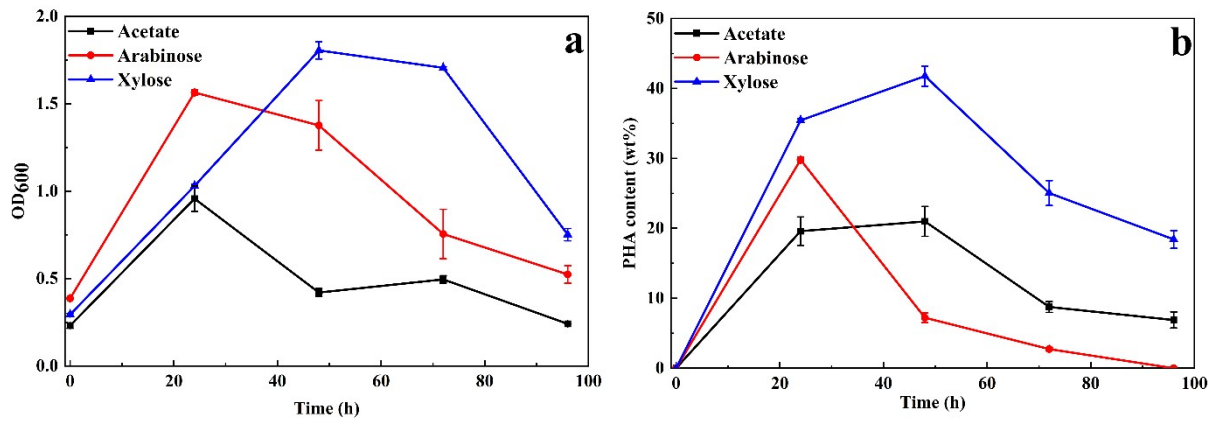

53

54 **Figure S5.** Cell growth (a) and PHA production (b) of *C. thermodepolymerans* using acetate, arabinose, or xylose as the  
 55 sole carbon source (5 g/L). The errors presented in the graphs represent the standard deviation (SD) of the data points,  
 56 calculated from triplicate measurements of each sample.

57

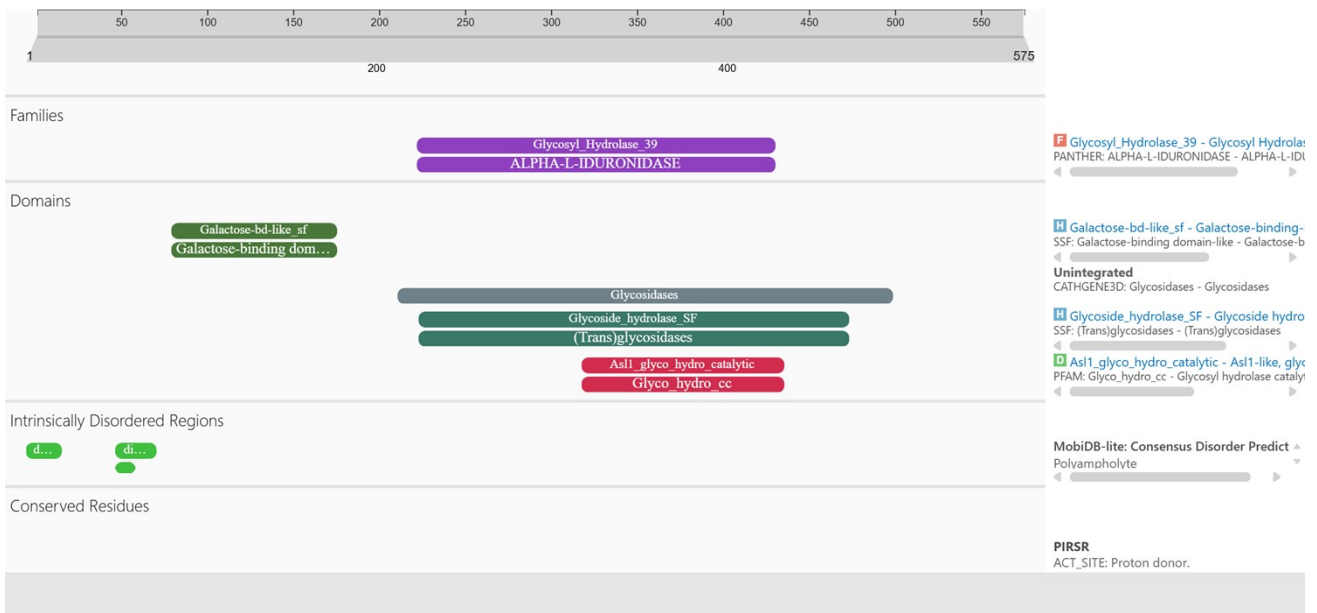

58

59 **Figure S6.** InterPro search of the protein ST39S (QPC32540.1)

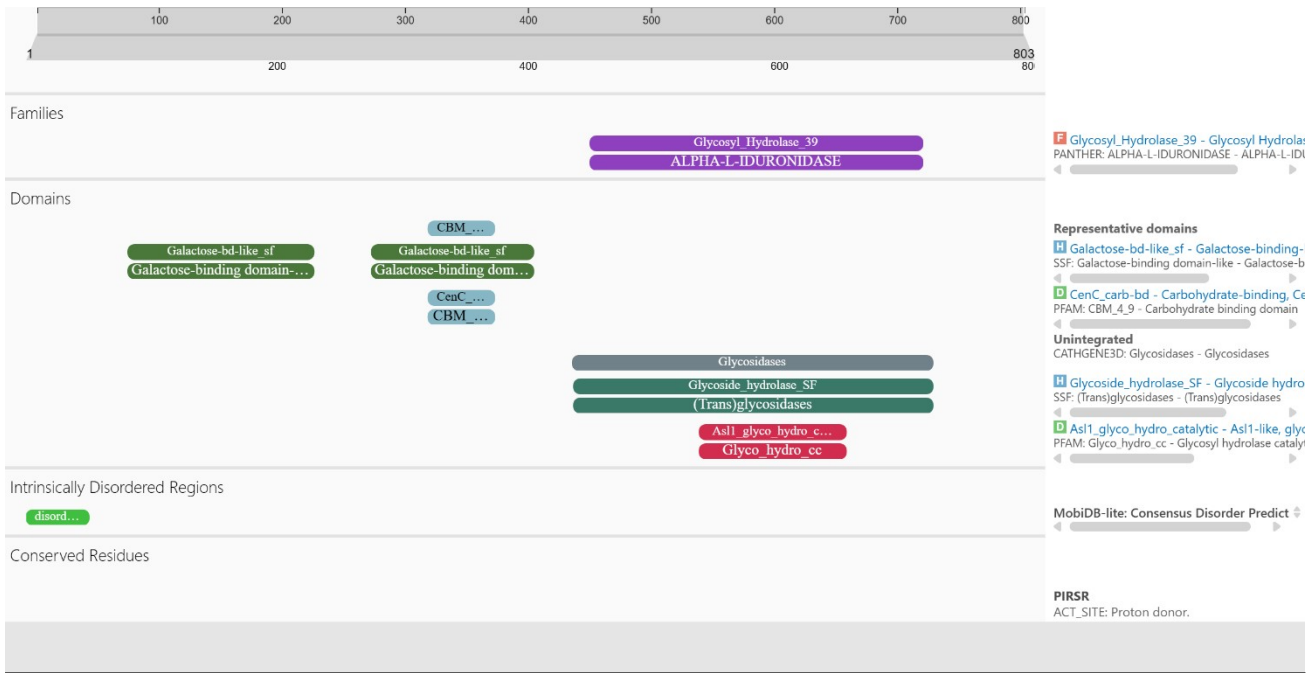

60

61

**Figure S7.** InterPro search of the protein ST39L (QPC32539.1)

62

63

**Table S1.** The predicted CAZymes that were obtained after a dbCAN with standard parameters search.

| Gene ID            | HMMER         | dbCAN_sub | DIAMOND | SignalP |
|--------------------|---------------|-----------|---------|---------|
| NZ_CP064338.1_1004 | GT14(34-257)  | GT14_e27  | GT14    | N       |
| NZ_CP064338.1_1006 | GT94(107-361) | GT94_e7   | N       | N       |
| NZ_CP064338.1_1007 | GT2(4-108)    | GT2       | GT2     | N       |
| NZ_CP064338.1_1009 | GH39(487-674) | GH39_e38  | GH39    | Y(1-19) |
| NZ_CP064338.1_1010 | GH39(274-473) | GH39_e85  | GH39    | Y(1-39) |
| NZ_CP064338.1_1011 | GT4(219-354)  | GT4_e1849 | GT4     | N       |
| NZ_CP064338.1_1012 | GT4(201-343)  | GT4_e829  | GT4     | N       |
| NZ_CP064338.1_1013 | GT4(225-361)  | GT4_e1696 | GT4     | N       |
| NZ_CP064338.1_1014 | GT26(51-222)  | GT26_e98  | GT26    | N       |
| NZ_CP064338.1_1072 | GT4(180-331)  | GT4_e2225 | GT4     | N       |
| NZ_CP064338.1_1073 | GT9(84-321)   | GT9_e318  | GT9     | N       |
| NZ_CP064338.1_1074 | GT4(185-327)  | GT4_e1924 | GT4     | N       |
| NZ_CP064338.1_1075 | CE4(66-204)   | CE4_e274  | N       | N       |
| NZ_CP064338.1_1091 | GT4(214-375)  | GT4_e171  | GT4     | N       |
| NZ_CP064338.1_1094 | GT9(86-335)   | GT9_e182  | GT9     | N       |
| NZ_CP064338.1_1096 | GT2(63-187)   | GT2       | GT2     | N       |
| NZ_CP064338.1_1098 | GT9(83-325)   | GT9_e110  | GT9     | N       |
| NZ_CP064338.1_1103 | GT4(197-331)  | GT4_e3402 | GT4     | N       |
| NZ_CP064338.1_1106 | GT4(196-334)  | GT4_e1620 | GT4     | N       |
| NZ_CP064338.1_1440 | CE4(60-185)   | CE4_e300  | N       | N       |
| NZ_CP064338.1_1441 | GT2(46-204)   | GT2       | GT2     | N       |
| NZ_CP064338.1_1442 | GT4(218-369)  | GT4_e3700 | GT4     | N       |

|                    |                                 |                    |               |         |
|--------------------|---------------------------------|--------------------|---------------|---------|
| NZ_CP064338.1_1443 | GT4(204-351)                    | GT4_e2314          | GT4           | N       |
| NZ_CP064338.1_1445 | GT4(216-350)                    | GT4_e1064          | GT4           | N       |
| NZ_CP064338.1_1447 | CE4(93-304)                     | CE4_e298           | N             | N       |
| NZ_CP064338.1_1500 | GT104(3-357)                    | GT104_e0           | GT104         | N       |
| NZ_CP064338.1_1728 | GT2(155-337)+GT2(250-463)       | GT2                | GT2           | N       |
| NZ_CP064338.1_1764 | GT51(81-255)                    | GT51_e153          | GT51          | N       |
| NZ_CP064338.1_1779 | CBM48(21-111)+GH13_11(191-540)  | CBM48_e3+GH13_e48  | CBM48+GH13_11 | N       |
| NZ_CP064338.1_1781 | GH13_16(49-402)                 | GH13_e0            | GH13_16       | N       |
| NZ_CP064338.1_1782 | GH13_3(239-460)                 | GH13_e41           | GH13_3        | N       |
| NZ_CP064338.1_1783 | CBM48(33-118)+GH13_9(182-482)   | CBM48_e2+GH13_e200 | CBM48+GH13_9  | N       |
| NZ_CP064338.1_1792 | CBM48(14-105)+GH13_11(184-533)  | CBM48_e3+GH13_e48  | CBM48+GH13_11 | N       |
| NZ_CP064338.1_1793 | GH13_10(121-435)                | CBM48_e0+GH13_e120 | CBM48+GH13_10 | N       |
| NZ_CP064338.1_1794 | GH77(164-706)+GH13_26(750-1121) | GH77_e27+GH13_e105 | GH13_26+GH77  | N       |
| NZ_CP064338.1_186  | GH1(24-455)                     | GH1_e107           | GH1           | N       |
| NZ_CP064338.1_1942 | GT19(8-363)                     | GT19_e37           | GT19          | N       |
| NZ_CP064338.1_2005 | GH23(150-287)                   | GH23_e326          | CBM50+GH23    | Y(1-39) |
| NZ_CP064338.1_2010 | GT51(56-223)                    | GT51_e71           | GT51          | N       |
| NZ_CP064338.1_2263 | GH103(52-348)                   | GH103_e12          | GH103         | Y(1-34) |
| NZ_CP064338.1_2306 | GT30(41-216)                    | GT30_e26           | GT30          | N       |
| NZ_CP064338.1_2484 | AA6(4-202)                      | AA6_e3             | N             | N       |
| NZ_CP064338.1_2517 | GH23(147-248)                   | GH23_e807          | GH23          | N       |
| NZ_CP064338.1_2622 | GH23(174-282)                   | GH23_e526          | GH23          | Y(1-26) |
| NZ_CP064338.1_264  | GT107(1-254)+GT107(239-591)     | GT107_e0+GT107_e2  | GT107         | N       |
| NZ_CP064338.1_265  | GT2(14-288)                     | GT2                | GT2           | N       |
| NZ_CP064338.1_2665 | GH73(145-280)                   | GH73_e233          | GH73          | N       |
| NZ_CP064338.1_2694 | GT41(29-638)                    | GT41_e27           | GT41          | N       |
| NZ_CP064338.1_2786 | CE11(4-283)                     | CE11_e22           | CE11          | N       |
| NZ_CP064338.1_2792 | GT28(186-349)                   | GT28_e46           | GT28          | N       |
| NZ_CP064338.1_2869 | GT51(62-237)                    | GT51_e98           | GT51          | Y(1-47) |
| NZ_CP064338.1_3186 | GH102(93-233)                   | GH102_e7           | GH102         | N       |
| NZ_CP064338.1_3223 | GT51(243-376)                   | GT51_e135          | GT51          | Y(1-29) |
| NZ_CP064338.1_3536 | AA3_2(11-556)                   | AA3_e57            | AA3           | N       |
| NZ_CP064338.1_3558 | GH15(228-590)                   | GH15_e57           | GH15          | N       |
| NZ_CP064338.1_3559 | GT20(3-455)                     | GT20_e1            | GT20          | N       |
| NZ_CP064338.1_3575 | AA4(57-252)                     | AA4_e1             | N             | N       |
| NZ_CP064338.1_436  | GH23(507-633)                   | GH23_e952          | GH23          | Y(1-33) |
| NZ_CP064338.1_697  | GT51(81-253)                    | GT51_e153          | GT51          | N       |
| NZ_CP064338.1_770  | GH23(97-194)                    | GH23_e653          | GH23          | N       |
| NZ_CP064338.1_809  | GH24(59-182)                    | GH24_e280          | GH24          | Y(1-21) |

|                    |               |            |       |         |
|--------------------|---------------|------------|-------|---------|
| NZ_CP064338.1_857  | GH78(370-598) | N          | GH0   | N       |
| NZ_CP064338.1_858  | GT4(168-302)  | GT4_e907   | GT4   | N       |
| NZ_CP064338.1_902  | GT4(179-321)  | GT4_e2553  | GT4   | N       |
| NZ_CP064338.1_903  | GT2(6-140)    | GT2        | GT2   | N       |
| NZ_CP064338.1_932  | GH3(55-286)   | GH3_e78    | GH3   | N       |
| NZ_CP064338.1_989  | GT41(26-564)  | GT41_e36   | GT41  | N       |
| NZ_CP064338.1_1099 | N             | GT4_e1925  | GT4   | N       |
| NZ_CP064338.1_3213 | N             | AA2_e1     | AA0   | N       |
| NZ_CP064338.1_427  | N             | CBM50_e780 | CBM50 | Y(1-38) |
| NZ_CP064338.1_969  | N             | CE4_e177   | CE4   | N       |
| NZ_CP064338.1_1560 | N             | CBM50_e330 | CBM50 | Y(1-25) |

64

65

66

67

68

69

70

71

**Table S2.** Results of the blast against the Swissprot database of the protein QPC32539.1

| Description                                                                          | Scientific Name                        | Max Score | Total Score | Query Cover | E value | Per. ident |
|--------------------------------------------------------------------------------------|----------------------------------------|-----------|-------------|-------------|---------|------------|
| RecName: Full=Endo-1,4-beta-xylanase C; AltName: Full=Xylanase X34; Flags: Precursor | <i>Aspergillus nidulans</i><br>FGSC A4 | 48.1      | 48.1        | 16%         | 0.0002  | 32.37      |
| RecName: Full=Endo-1,4-beta-xylanase; Full=FIA-xylanase;                             | <i>Aspergillus aculeatus</i>           | 45.1      | 45.1        | 16%         | 0.002   | 27.01      |
| RecName: Full=Endo-1,4-beta-xylanase Full=Endo-1,4-beta-xylanase AltName: Full=TAXI  | <i>Claviceps purpurea</i>              | 44.3      | 44.3        | 15%         | 0.003   | 31.54      |
| RecName: Full=Endo-1,4-beta-xylanase Full=1,4-beta-D-xylan xylanohydrolase F3        | <i>Thermoascus aurantiacus</i>         | 43.1      | 43.1        | 16%         | 0.006   | 28.57      |
| RecName: Full=Endo-1,4-beta-xylanase Full=1,4-beta-D-xylan xylanohydrolase F3        | <i>Aspergillus oryzae</i><br>RIB40     | 43.1      | 43.1        | 16%         | 0.006   | 26.62      |
| RecName: Full=Alpha-L-iduronidase; Flags: Precursor                                  | <i>Homo sapiens</i>                    | 42.4      | 42.4        | 16%         | 0.017   | 27.27      |



RecName: Full=Alpha-L-  
iduronidase; Flags: *Mus musculus* 41.6 41.6 16% 0.029 28.57  
Precursor

72

73 **Table S3.** Results of the blast against the PDB database of the protein QPC32539.1

| Description                                                                                                                                                                                | Scientific Name                   | Max Score | Total Score | Query Cover | E value | Per.ident |
|--------------------------------------------------------------------------------------------------------------------------------------------------------------------------------------------|-----------------------------------|-----------|-------------|-------------|---------|-----------|
| Crystal Structure of xylanase (GH10) in complex with inhibitor (XIP)                                                                                                                       | <i>Aspergillus nidulans</i>       | 47.8      | 47.8        | 16%         | 0.00004 | 32.37     |
| Ultra high resolution structure of a Thermostable Xylanase from <i>Thermoascus aurantiacus</i>                                                                                             | <i>Thermoascus aurantiacus</i>    | 43.5      | 43.5        | 16%         | 1       | 28.57     |
| The xylanase TA from <i>Thermoascus aurantiacus</i> utilizes arabinose decorations of xylan as significant substrate specificity determinants                                              | <i>Thermoascus aurantiacus</i>    | 43.5      | 43.5        | 16%         | 1       | 28.57     |
| Structural studies on the mobility in the active site of the <i>Thermoascus aurantiacus</i> xylanase I                                                                                     | <i>Thermoascus aurantiacus</i>    | 43.5      | 43.5        | 16%         | 1       | 28.57     |
| Thermostable xylanase I from <i>Thermoascus aurantiacus</i> - Crystal form II                                                                                                              | <i>Thermoascus aurantiacus</i>    | 43.5      | 43.5        | 16%         | 1       | 28.57     |
| Crystal structure of apo-iduronidase in the R3 form <i>Homo sapiens</i>                                                                                                                    | <i>Homo sapiens</i>               | 42.4      | 42.4        | 16%         | 3       | 27.27     |
| New Irreversible $\alpha$ -L-Iduronidase Inhibitors and Activity-Based Probes                                                                                                              | <i>Homo sapiens</i>               | 42.4      | 42.4        | 16%         | 4       | 27.27     |
| Human $\alpha$ -L-iduronidase                                                                                                                                                              | <i>Homo sapiens</i>               | 42.4      | 42.4        | 16%         | 4       | 27.27     |
| Crystal structure of human $\alpha$ -L-iduronidase complex with 5-fluoro- $\alpha$ -L-idopyranosyluronic acid fluoride                                                                     | <i>Homo sapiens</i>               | 42.0      | 42.0        | 16%         | 4       | 27.27     |
| High Resolution Crystal Structure Of A Thermostable Xylanase From <i>Thermoascus Aurantiacus</i>                                                                                           | <i>Thermoascus aurantiacus</i>    | 41.6      | 41.6        | 16%         | 4       | 28.68     |
| Crystal Structure of an Inactive Kemp Elimination Design HG-1                                                                                                                              | <i>Thermoascus aurantiacus</i>    | 41.2      | 41.2        | 16%         | 6       | 25.53     |
| Xylanase from <i>Penicillium simplicissimum</i> , complex with <i>simplicissimum</i> , complex with 1,2-(4-deoxy- $\beta$ -L-thero-hex-4-enopyranosyluronic-acid)- $\beta$ -1,4-xylotriose | <i>Penicillium simplicissimum</i> | 39.3      | 39.3        | 18%         | 22      | 27.06     |

74

75 **Table S4.** Proteomic analysis of total protein from the extracellular culture liquid at t=0 and after growth for 48 hours on  
76 beechwood xylan or wheat arabinoxylan

| Enzymes                                           |                                                                 | 0 h                    | Beechwood<br>xylan-48 h | Wheat<br>arabinoxylan-<br>48 h |
|---------------------------------------------------|-----------------------------------------------------------------|------------------------|-------------------------|--------------------------------|
| Transporter                                       | Transporter                                                     | 0                      | 17309.17                | 72317.352                      |
|                                                   | ABC transporter substrate-binding protein                       | 139705.7               | 1125489                 | 225303237                      |
|                                                   | ABC transporter ATP-binding protein                             | 15830.6                | 222673                  | 2258912.1                      |
|                                                   | ABC transporter permease                                        | 133517.8               | 482578.9                | 79575975                       |
|                                                   | ABC transporter                                                 | 0                      | 1208.621                | 1312726.8                      |
|                                                   | BMP family ABC transporter substrate-binding protein            | 554914.3               | 88489.13                | 5849114.3                      |
|                                                   | C4-dicarboxylate ABC transporter substrate-binding protein      | 0                      | 255137.2                | 50154997                       |
|                                                   | C4-dicarboxylate ABC transporter                                | 55756.83               | 286737.4                | 33042947                       |
|                                                   | C4-dicarboxylate ABC transporter permease                       | 0                      | 26155.35                | 0                              |
|                                                   | Amino acid/amide ABC transporter substrate-binding protein      | 1331315                | 538700.9                | 122887903                      |
|                                                   | Carbohydrate ABC transporter substrate-binding protein          | 30018.55               | 441776.9                | 14227445                       |
|                                                   | Branched-chain amino acid ABC transporter permease              | 0                      | 12370.23                | 92559.859                      |
|                                                   | Ammonium transporter                                            | 0                      | 21286.03                | 34918.34                       |
|                                                   | Efflux transporter periplasmic adaptor subunit                  | 227388.3               | 1691.521                | 150210.5                       |
|                                                   | sugar transporter subunit IIA                                   | 0                      | 21844.94                | 4161114.3                      |
|                                                   | LPS export ABC transporter permease                             | 0                      | 9241.949                | 0                              |
|                                                   | Lysophospholipid transporter                                    | 0                      | 17614.61                | 0                              |
|                                                   | Sodium-independent anion transporter                            | 0                      | 20137.29                | 121645.81                      |
|                                                   | Fe (3+) ABC transporter substrate-binding protein               | 0                      | 44726.75                | 528021.75                      |
|                                                   | Sulfate ABC transporter substrate-binding protein               | 0                      | 38142.63                | 9300577                        |
|                                                   | Cobalamin ABC transporter ATP-binding protein                   | 0                      | 24699.37                | 144565.44                      |
|                                                   | Tripartite-type tricarboxylate transporter receptor subunit     | 37122.06               | 238572                  | 84035509                       |
|                                                   | Tripartite tricarboxylate transporter substrate binding protein | 0                      | 8665.682                | 320510.13                      |
|                                                   | MFS transporter                                                 | 0                      | 3331.7                  | 186677.02                      |
|                                                   | TRAP transporter permease                                       | 0                      | 26275.34                | 53178.809                      |
|                                                   | Drug/metabolite transporter (DMT)-like permease                 | 0                      | 11521.64                | 0                              |
|                                                   | EmrB/QacA subfamily drug resistance transporter                 | 0                      | 2277.696                | 0                              |
|                                                   | AI-2E family transporter                                        | 0                      | 29949.5                 | 73228.438                      |
|                                                   | Efflux RND transporter periplasmic adaptor subunit              | 0                      | 9253.369                | 118919.13                      |
|                                                   | Dipeptide ABC transporter ATP-binding protein                   | 55375.15               | 0                       | 0                              |
|                                                   | Membrane protein                                                | Outer membrane protein | 1281631                 | 4347670                        |
| Putative membrane protein                         |                                                                 | 235801.3               | 221017.9                | 1251239.4                      |
| Amino acid ABC transporter membrane protein       |                                                                 | 38465.6                | 188113.4                | 1698956.3                      |
| Putative tricarboxylic transport membrane protein |                                                                 | 0                      | 30200.94                | 19376066                       |
| Putative salt-induced outer membrane protein      |                                                                 | 0                      | 5918.958                | 77274.719                      |
| Carbohydrate ABC transporter membrane             | 0                                                               | 32688.42               | 0                       |                                |

| protein                   |                                                                              |          |          |           |
|---------------------------|------------------------------------------------------------------------------|----------|----------|-----------|
|                           | Membrane protein                                                             | 6725.177 | 10172.73 | 0         |
|                           | Protein-export membrane protein SecE                                         | 0        | 11953.55 | 0         |
|                           | Membrane protein insertase                                                   | 0        | 4054.811 | 839012.19 |
|                           | PEP-CTERM system-associated outer membrane protein                           | 156642   | 89958.48 | 626162.06 |
|                           | O-antigen/teichoic acid export membrane protein                              | 0        | 5163.34  | 0         |
|                           | Type VI secretion system membrane subunit                                    | 0        | 29144.91 | 209504.38 |
|                           | Succinate dehydrogenase hydrophobic membrane anchor subunit                  | 0        | 0        | 131542.56 |
|                           | Protein-export membrane protein                                              | 0        | 14610.46 | 53715.914 |
|                           | Putative RDD family membrane protein                                         | 0        | 4935.892 | 0         |
|                           | NodT family efflux transporter outer membrane factor (OMF) lipoprotein       | 0        | 7608.985 | 83046.758 |
|                           | Efflux pump membrane transporter                                             | 13771.63 | 33397.38 | 119916.85 |
|                           | Uncharacterized membrane protein                                             | 0        | 7955.448 | 0         |
|                           | Glucose-6-phosphate isomerase                                                | 0        | 11096.74 | 563280.25 |
|                           | 6-phosphofructokinase                                                        | 0        | 16988.08 | 397465.69 |
|                           | ADP-dependent glucokinase/phosphofructokinase                                | 0        | 16988.08 | 397465.69 |
|                           | Fructose-bisphosphate aldolase class Ia, DhnA family                         | 10494.68 | 50971.35 | 8028198   |
|                           | Triosephosphate isomerase                                                    | 0        | 16549.23 | 2035152.8 |
| Glycolysis                | Glyceraldehyde-3-phosphate dehydrogenase/erythrose-4-phosphate dehydrogenase | 617521.1 | 40543.21 | 16066581  |
|                           | 3-phosphoglycerate kinase                                                    | 0        | 75889.34 | 35991748  |
|                           | Phosphoglycerate mutase (BPG-dependent)                                      | 0        | 68539.97 | 5923951.5 |
|                           | 2,3-bisphosphoglycerate-independent phosphoglycerate mutase, archaeal type   | 0        | 68539.97 | 5923951.5 |
|                           | Enolase                                                                      | 113322.1 | 32661.18 | 2205944.8 |
|                           | Pyruvate kinase                                                              | 0        | 4895.187 | 1751279.9 |
| Entner-Doudoroff pathway  | 2-dehydro-3-deoxy-phosphogluconate aldolase                                  | 0        | 17298.79 | 1903680.1 |
|                           | Glucose-6-phosphate 1-dehydrogenase                                          | 0        | 18456.01 | 739141.06 |
| Pentose phosphate pathway | Ribose 5-phosphate isomerase                                                 | 0        | 73970.46 | 4452923   |
|                           | Transketolase                                                                | 0        | 22956.66 | 693371.19 |
|                           | Transaldolase/fructose-6-phosphate aldolase                                  | 8107.817 | 47216.61 | 4322302.5 |
|                           | Acetyl-CoA carboxylase alpha subunit                                         | 0        | 15661.53 | 108470.2  |
|                           | Biotin carboxyl carrier protein                                              | 0        | 0        | 379910.31 |
|                           | Biotin carboxylase                                                           | 0        | 26050.21 | 197681.47 |
|                           | Acetyl-CoA carboxylase beta subunit                                          | 0        | 15063.8  | 266006.03 |
| Fatty acid synthesis      | Malonyl CoA-acyl carrier protein transacylase                                | 0        | 229619.4 | 24986800  |
|                           | 3-oxoacyl-[acyl-carrier-protein] synthase III                                | 0        | 26893.13 | 1412349.4 |
|                           | NAD(P)-dependent dehydrogenase, short-chain alcohol dehydrogenase family     | 0        | 68868.23 | 16740414  |
|                           | 3-hydroxymyristoyl/3-hydroxydecanoyl-(acyl carrier protein) dehydratase      | 0        | 13599.37 | 5313491   |

|                       |                                                                        |          |          |           |
|-----------------------|------------------------------------------------------------------------|----------|----------|-----------|
|                       | Enoyl-[acyl-carrier-protein] reductase FabI                            | 0        | 33608.79 | 1070500   |
|                       | 3-oxoacyl-(acyl-carrier-protein) synthase                              | 0        | 26893.13 | 1412349.4 |
|                       | Acetyl-CoA acetyltransferase                                           | 0        | 9995.566 | 4880144.5 |
|                       | 3-hydroxyacyl-CoA dehydrogenase                                        | 0        | 90561.81 | 9627799.8 |
|                       | Enoyl-CoA hydratase/carnithine racemase                                | 0        | 93012.52 | 5296138.1 |
|                       | Acyl-CoA dehydrogenase related to the alkylation response protein AidB | 131242.5 | 1004792  | 32107102  |
|                       | Acyl carrier protein                                                   | 0        | 13599.37 | 5313491   |
|                       | 3-Ketoacyl CoA thiolase                                                | 0        | 0        | 654933.19 |
|                       | D-xylose ABC transporter                                               | 0        | 643372   | 360684928 |
| Xylose utilization    | Xylose isomerase                                                       | 0        | 29866.35 | 4176567   |
|                       | Xylulose kinase                                                        | 0        | 0        | 93138.625 |
|                       | Glucose/arabinose dehydrogenase                                        | 0        | 0        | 244401.05 |
|                       | Arabinose-5-phosphate isomerase                                        | 0        | 0        | 1233705   |
| Arabinose utilization | Aldose 1-epimerase                                                     | 0        | 35474.29 | 2920257.3 |
|                       | Ribulose-phosphate 3-epimerase                                         | 138586.1 | 43139.48 | 1805026.1 |
|                       | 4-amino-4-deoxy-L-arabinose transferase-like glycosyltransferase       | 0        | 9186.413 | 17453.438 |
| Xylan degradation     | Carbohydrate binding protein (QPC32539)                                | 0        | 0        | 9441.758  |
|                       | Uncharacterized protein (QPC32540)                                     | 0        | 0        | 23396.098 |

77

78

79
